# Supplementary material for: Gellan Gum Is a Suitable Biomaterial for Manual and Bioprinted Setup of Long-Term Stable, Functional 3D-Adipose Tissue Models
Source: MDPI journal article supplement (doi:10.3390/gels8070420), 2022-07-05
Supplement: s1 [file s1]

Supplementary Figure S1. Live-dead staining of encapsulated diffASCs:

supplement 1: live-dead staining in direct contact until day 84  
day 56 day 84

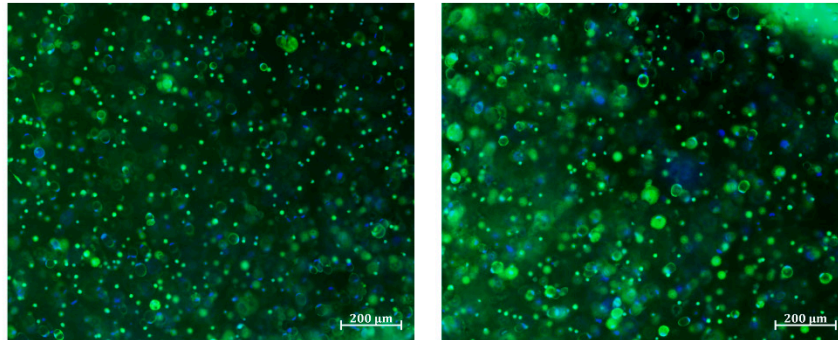

**Figure S1.** Live-dead staining of diffASC in GG-hydrogels on days 56 and 84, viable cells in green, dead cells in red, and nuclei in blue. Scale bar 100  $\mu$ M, n = 5.
